# Supplementary material
Source: Springer Nature journal article supplement (https://www.springermedizin.de/resource/supplementary/13011_2007_79_MOESM1_ESM.pdf/9628398)

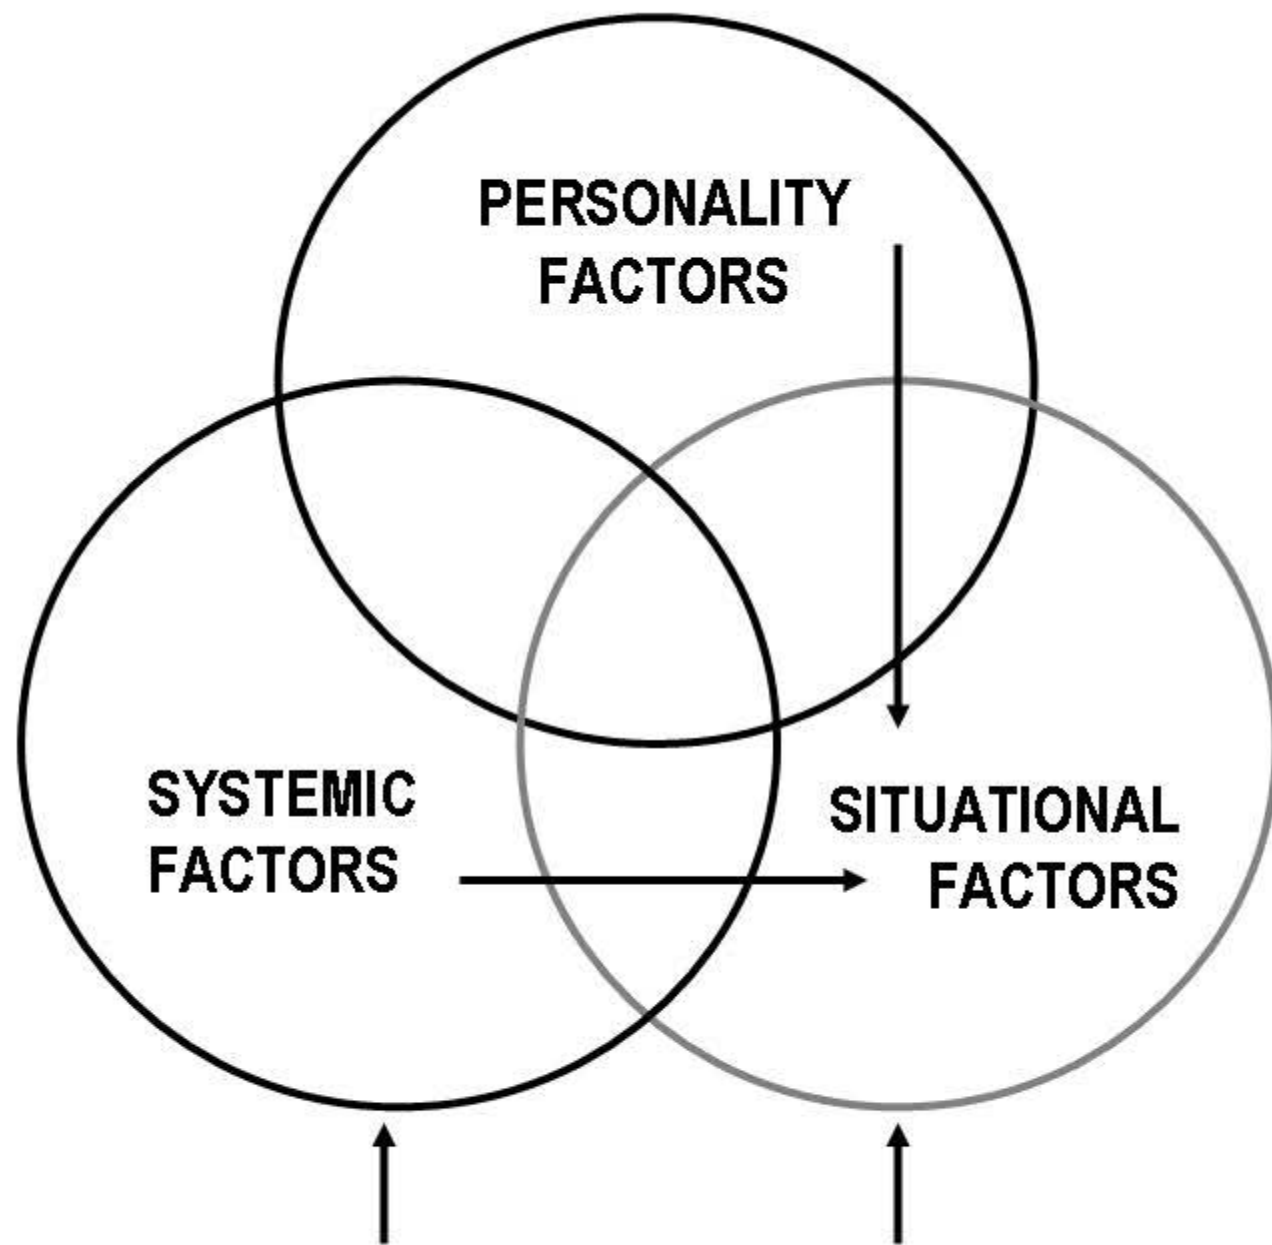

**EXTERNAL EVENTS (i.e. availability of a new PE method or test)**

Supplement: MOESM1 [file 9628398]
